# Supplementary material for: Distribution Pattern of Woody Plants in a Mountain Forest Ecosystem Influenced by Topography and Monsoons
Source: MDPI journal article supplement (doi:10.3390/f13060957), 2022-06-19
Supplement: s1 [file s1]

**This supplementary file contains:**

**Table S1.** An overview of all of the methods.

**Table S2.** Stand features of each plot on the north and south aspects of Funiu mountain.

**Table S3.** Dominant species in north and south aspects of Funiu mountain range. The important values were calculated as follows: important value = (relative abundance (%) + relative frequency (%) + relative basal area at breast height (%))/3.

**Table S1.** An overview of all of the methods

| Purposes                                                                                                                     | Methods                     | Analytical methods and references                         |
|------------------------------------------------------------------------------------------------------------------------------|-----------------------------|-----------------------------------------------------------|
| To understand the community structure of woody plants in different aspects                                                   | Importance value            | The “vegan” package of R software [36]                    |
| To prove that our sampling is adequate                                                                                       | Species accumulation curves | The “vegan” package of R software [47]                    |
| To compare differences in species richness and abundance on different aspects, and whether those differences are significant | Kruskal–Wallis method       | The “multcomp” and “ggpubr” package of R software [37-38] |
| To examine the differences of assemblage characteristics of woody plants in different aspects                                |                             |                                                           |
| In order to visualize the species composition and distribution ratio of different aspects                                    | Chord diagram               | R software [39]                                           |
| To test the effect of habitat division on beta diversity of woody plants, and to test whether it is significant              | PCoA analysis and ANOVA     | The “vegan” package of R software [39]                    |

|                                                                                                                                                                  |                                                                                                    |                                 |                                                                                                                                                                                                                                                                |
|------------------------------------------------------------------------------------------------------------------------------------------------------------------|----------------------------------------------------------------------------------------------------|---------------------------------|----------------------------------------------------------------------------------------------------------------------------------------------------------------------------------------------------------------------------------------------------------------|
| <p>The specificity of woody plants to different aspects at the community level was analyzed</p>                                                                  | <p>To examine the distribution characteristics and preferences of species on different aspects</p> | <p>Network diagram analysis</p> | <p>Based on species abundance, calculations are performed using Gephi in the Java programming language, where, the modularity index is calculated using Gephi, and the specialization index is calculated using the “Bipartite” package of R software [42]</p> |
| <p>The distribution preference of species in two different aspects was analyzed at species level.</p>                                                            |                                                                                                    | <p>Torus translation tests</p>  | <p>R software [43]</p>                                                                                                                                                                                                                                         |
| <p>To examine the difference of interspecific relationship in different aspects and analyze the effect of interspecific relationship on species distribution</p> |                                                                                                    | <p>Co-occurrence network</p>    | <p>Spearman's correlation coefficients were visualized by Gephi in Java programming language. Node, links, modularity index, average clustering coefficient, and average path length are calculated.</p>                                                       |

**Table S2.** Stand features of each plot on the north and south aspects of Funiu mountain

| Aspects          | Plots  | Main dominant species                                                                                                | Longitude and latitude    | Aspect | Slope  | Elevation | Convex |
|------------------|--------|----------------------------------------------------------------------------------------------------------------------|---------------------------|--------|--------|-----------|--------|
| The south aspect | Plot 1 | <i>Quercus serrata</i> ; <i>Cornus kousa</i> subsp. <i>Chinensis</i> ; <i>Quercus variabilis</i>                     | 33°29'795"E, 111°55'967"N | 274.78 | 17.30  | 1387.09   | 0.05   |
|                  | Plot 2 | <i>Quercus serrata</i> ; <i>Quercus variabilis</i> ; <i>Sorbus alnifolia</i>                                         | 33°29'874"E, 111°55'465"N | 283.15 | 20.76  | 1296.28   | 0.19   |
|                  | Plot 3 | <i>Quercus aliena</i> var. <i>Acuteserrata</i> ; <i>Cornus kousa</i> subsp. <i>Chinensis</i> ; <i>Pinus armandii</i> | 33°30'144"E, 111°55'261"N | 237.06 | 21.70  | 1252.16   | -0.18  |
|                  | Plot 4 | <i>Quercus aliena</i> var. <i>Acuteserrata</i> ; <i>Symplocos paniculata</i> ; <i>Forsythia suspensa</i>             | 33°30'254"E, 111°55'997"N | 146.19 | 21.87  | 1437.19   | -0.18  |
|                  | Plot 5 | <i>Quercus aliena</i> var. <i>Acuteserrata</i> ; <i>Sorbus alnifolia</i> ; <i>Lindera obtusiloba</i>                 | 33°29'708"E, 111°55'588"N | 240.97 | 13.95  | 1294.69   | -0.07  |
| The north aspect | Plot 1 | <i>Quercus aliena</i> var. <i>Acuteserrata</i> ; <i>Pinus tabuliformis</i> ; <i>Larix gmelinii</i>                   | 33°39'27"E, 111°50'31"N   | 159.97 | 17.49  | 1647.36   | -4.35  |
|                  | Plot 2 | <i>Quercus aliena</i> var. <i>Acuteserrata</i> ; <i>Litsea tsinlingensis</i> ; <i>Sorbus hupehensis</i>              | 33°45'27"E, 112°14'40"N   | 221.51 | 19.36  | 1777.75   | 4.91   |
|                  | Plot 3 | <i>Quercus aliena</i> var. <i>Acuteserrata</i> ; <i>Pinus armandii</i> ; <i>Forsythia suspensa</i>                   | 33°40'6"E, 111°51'55"N    | 126.20 | 25.48  | 1413.24   | -3.88  |
|                  | Plot 4 | <i>Quercus aliena</i> var. <i>Acuteserrata</i> ; <i>Corylus heterophylla</i> ; <i>Forsythia suspensa</i>             | 33°39'27"E, 111°50'4"N    | 114.40 | 23.927 | 1578.66   | -0.97  |
|                  | Plot 5 | <i>Quercus aliena</i> var. <i>Acuteserrata</i> ; <i>Pinus armandii</i> ; <i>Toxicodendron vernicifluum</i>           | 33°39'32"E, 111°50'11"N   | 207.09 | 21.22  | 1563.43   | 2.23   |

**Table S3.** Dominant species in north and south aspects of Funiu mountain range. The important values were calculated as follows: important value = (relative abundance (%) + relative frequency (%) + relative basal area at breast height (%))/3.

| Species                                            | Life form | Abundance (individual) | Mean DBH (cm) | Basal area at breast height (cm <sup>2</sup> ) | Importance value |
|----------------------------------------------------|-----------|------------------------|---------------|------------------------------------------------|------------------|
| <b>The south aspect</b>                            |           |                        |               |                                                |                  |
| <i>Quercus aliena</i> var. <i>acutiserrata</i>     | Tree      | 1686                   | 21.76         | 79.69                                          | 23.07            |
| <i>Quercus serrata</i>                             | Tree      | 887                    | 14.44         | 21.12                                          | 8.03             |
| <i>Quercus variabilis</i>                          | Tree      | 383                    | 24.64         | 21.57                                          | 6.23             |
| <i>Sorbus alnifolia</i>                            | Tree      | 934                    | 4.48          | 2.98                                           | 4.47             |
| <i>Pinus armandii</i>                              | Tree      | 362                    | 18.96         | 11.70                                          | 4.12             |
| <i>Cornus kousa</i> subsp. <i>chinensis</i>        | Tree      | 899                    | 3.14          | 1.27                                           | 3.98             |
| <i>Forsythia suspensa</i>                          | Shrub     | 762                    | 2.01          | 0.28                                           | 13.99            |
| <i>Symplocos paniculata</i>                        | Shrub     | 333                    | 2.04          | 0.16                                           | 7.08             |
| <i>Euonymus alatus</i>                             | Shrub     | 267                    | 2.34          | 0.19                                           | 6.77             |
| <i>Cornus schindleri</i> subsp. <i>poliophylla</i> | Shrub     | 28                     | 10.34         | 0.35                                           | 6.40             |
| <i>Litsea tsinlingensis</i>                        | Shrub     | 197                    | 2.29          | 0.10                                           | 4.41             |
| <i>Philadelphus incanus</i>                        | Shrub     | 207                    | 1.61          | 0.05                                           | 3.71             |
| <b>The north aspect</b>                            |           |                        |               |                                                |                  |
| <i>Quercus aliena</i> var. <i>acutiserrata</i>     | Tree      | 3789                   | 12.99         | 79.63                                          | 31.31            |
| <i>Pinus armandii</i>                              | Tree      | 995                    | 12.13         | 14.27                                          | 7.00             |
| <i>Pinus tabulaeformis</i>                         | Tree      | 500                    | 12.77         | 8.09                                           | 4.00             |
| <i>Lindera obtusiloba</i>                          | Tree      | 928                    | 5.17          | 2.61                                           | 3.99             |
| <i>Toxicodendron vernicifluum</i>                  | Tree      | 503                    | 10.70         | 6.25                                           | 3.57             |
| <i>Sorbus alnifolia</i>                            | Tree      | 804                    | 3.93          | 1.49                                           | 3.34             |
| <i>Forsythia suspensa</i>                          | Shrub     | 1231                   | 2.17          | 0.79                                           | 15.71            |
| <i>Litsea tsinlingensis</i>                        | Shrub     | 455                    | 4.38          | 1.11                                           | 10.87            |
| <i>Corylus heterophylla</i>                        | Shrub     | 633                    | 3.15          | 0.66                                           | 9.88             |
| <i>Cerasus clarifolia</i>                          | Shrub     | 2187                   | 6.63          | 1.01                                           | 8.00             |
| <i>Malus honanensis</i>                            | Shrub     | 267                    | 4.13          | 0.73                                           | 7.10             |
| <i>Symplocos paniculata</i>                        | Shrub     | 346                    | 3.19          | 0.53                                           | 6.71             |
